# Supplementary material for: The aromatic nature of auracycles and diauracycles based on calculated ring-current strengths
Source: Royal Society of Chemistry journal article supplement (doi:10.1039/d4dt00827h), 2024-01-01
Supplement: d4dt00827h1.pdf [file d4dt00827h1.pdf]

# Journal Name

ARTICLE TYPE

ELECTRONIC SUPPLEMENTARY INFORMATION

## The aromatic nature of auracycles and diauracycles based on calculated ring-current strengths<sup>†</sup>

Daniel Blasco<sup>\*a</sup> and Dage Sundholm<sup>\*b</sup>

---

<sup>a</sup> Departamento de Química, Instituto de Investigación en Química (IQUR), Universidad de La Rioja, Madre de Dios 53, 26006, Logroño, Spain; E-mail: daniel.blascos@unirioja.es

<sup>b</sup> Department of Chemistry, Faculty of Science, University of Helsinki, P. O. Box 55 (A. I. Virtasen aukio 1), FIN-00014, Helsinki, Finland; E-mail: dage.sundholm@helsinki.fi

## Strengths of current-density vortices

Table S1 The net, diatropic, and paratropic ring-current strengths (in nA T<sup>-1</sup>) of auracycles 1-4 at the DFT/BHandHLYP/def2-TZVP, 1C-X2C/BHandHLYP/def2-TZVP, and 2C-X2C/ $\omega$ B97X-D/def2-TZVP levels of theory

| Level of theory                                               | Net   | Diatropic | Paratropic |
|---------------------------------------------------------------|-------|-----------|------------|
| <b>[Au(C<sub>5</sub>H<sub>5</sub>)] (1)</b>                   |       |           |            |
| QR-ECP                                                        | 10.51 | 15.63     | -5.11      |
| 1C-X2C                                                        | 10.43 | 15.58     | -5.15      |
| 2C-X2C                                                        | 14.32 | -         | -          |
| <b>[Au(NC<sub>4</sub>H<sub>4</sub>)] (2)</b>                  |       |           |            |
| QR-ECP                                                        | 7.41  | 13.06     | -5.65      |
| 1C-X2C                                                        | 7.24  | 12.25     | -5.01      |
| <b>[Au(C<sub>6</sub>H<sub>6</sub>)<sup>+</sup>] (3)</b>       |       |           |            |
| QR-ECP                                                        | 3.82  | 11.92     | -8.10      |
| 1C-X2C                                                        | 7.55  | 14.21     | -6.66      |
| 2C-X2C                                                        | 3.90  | -         | -          |
| <b>[AuCl(C<sub>6</sub>H<sub>6</sub>)] (3-Cl)</b>              |       |           |            |
| QR-ECP                                                        | 4.21  | 12.08     | -7.87      |
| 1C-X2C                                                        | 4.29  | 12.15     | -7.86      |
| 2C-X2C                                                        | 4.25  | -         | -          |
| <b>[AuCl(C<sub>4</sub>H<sub>4</sub>)(NH<sub>3</sub>)] (4)</b> |       |           |            |
| QR-ECP                                                        | -4.41 | 6.20      | -10.61     |
| 1C-X2C                                                        | -4.51 | 6.17      | -10.68     |
| 2C-X2C                                                        | -4.59 | -         | -          |

Table S2 The gold-gold distance (in pm) and the bond-current strength (in nA T<sup>-1</sup>) of diauracycles 5-17, calculated at the DFT/BHandHLYP/def2-TZVP level of theory with the GIMIC method, and at the DFT/ $\omega$ B97X-D/def2-TZVP level of theory using numerical line integration of Ampère-Maxwell's law

| Molecule                                                                                 | Au-Au distance | Net current (GIMIC) | Net current (Ampère-Maxwell's law) |
|------------------------------------------------------------------------------------------|----------------|---------------------|------------------------------------|
| [Au <sub>2</sub> (NCH) <sub>2</sub> ] (5)                                                | 293.29         | 1.80                | 1.74                               |
| [Au <sub>2</sub> (NHCH) <sub>2</sub> ] (6)                                               | 263.97         | 3.98                | 3.92                               |
| [Au <sub>2</sub> Cl <sub>2</sub> (NHCH) <sub>2</sub> ] (7)                               | 244.83         | 11.11               | 9.73                               |
| [Au <sub>2</sub> Cl <sub>2</sub> {(NH) <sub>2</sub> CH <sub>2</sub> } <sub>2</sub> ] (8) | 250.23         | 10.40               | 9.34                               |
| [Au <sub>2</sub> {(NH) <sub>2</sub> CH <sub>2</sub> } <sub>2</sub> ] (9)                 | 273.64         | 2.69                | 2.53                               |
| [Au <sub>2</sub> {N(NH)CH <sub>2</sub> } <sub>2</sub> ] (10)                             | 279.49         | 1.97                | 1.82                               |
| [Au <sub>2</sub> (N <sub>2</sub> CH) <sub>2</sub> ] (11) <sup>a</sup>                    | 263.30         | 3.65                | 3.48                               |
| [Au <sub>2</sub> {NH(CH) <sub>2</sub> } <sub>2</sub> ] (12)                              | 250.01         | 9.88                | 10.07                              |
| [Au <sub>2</sub> {NH(CH) <sub>2</sub> } <sub>2</sub> ] (13)                              | 276.53         | 2.50                | 2.23                               |
| [Au <sub>2</sub> {S <sub>2</sub> CC(CN) <sub>2</sub> } <sub>2</sub> ] <sup>2-</sup> (14) | 275.84         | 2.65                | 2.80                               |
| [Au <sub>2</sub> {N <sub>2</sub> (CH) <sub>2</sub> } <sub>2</sub> ] (15)                 | 245.41         | <sup>b</sup>        | 10.71                              |
| [Au <sub>2</sub> {(NH) <sub>2</sub> (CH) <sub>2</sub> } <sub>2</sub> ] (16)              | 284.77         | 3.33                | 3.17                               |
| [Au <sub>2</sub> Cl <sub>2</sub> {N(NH)(CH) <sub>2</sub> } <sub>2</sub> ] (17)           | 250.11         | <sup>b</sup>        | 10.56                              |

<sup>a</sup> Triplet state

<sup>b</sup> The value is not reliable because the plane cuts undesired vortexes

Table S3 The X–Au–X angle (in °) versus the ring-current strength (in nA T<sup>-1</sup>) of molecules 1-18

| Molecule                                                                                 | X–Au–X angle | Ring-current strength |
|------------------------------------------------------------------------------------------|--------------|-----------------------|
| [Au(C <sub>5</sub> H <sub>5</sub> )] (1)                                                 | 103.1        | 10.51                 |
| [Au(NC <sub>4</sub> H <sub>4</sub> )] (2)                                                | 107.3        | 7.41                  |
| [Au(C <sub>6</sub> H <sub>6</sub> ) <sup>+</sup> ] (3)                                   | 83.0         | 3.82                  |
| [AuCl(C <sub>6</sub> H <sub>6</sub> )] (3·Cl)                                            | 90.8         | 4.21                  |
| [AuCl(C <sub>4</sub> H <sub>4</sub> )(NH <sub>3</sub> )] (4)                             | 80.5         | –4.41                 |
| [Au <sub>2</sub> (NCH) <sub>2</sub> ] (5)                                                | 130.9        | 12.43                 |
| [Au <sub>2</sub> (NHCH) <sub>2</sub> ] (6)                                               | 142.1        | –2.96                 |
| [Au <sub>2</sub> Cl <sub>2</sub> (NHCH) <sub>2</sub> ] (7)                               | 147.0        | –1.18                 |
| [Au <sub>2</sub> Cl <sub>2</sub> {(NH) <sub>2</sub> CH <sub>2</sub> } <sub>2</sub> ] (8) | 174.1        | –3.02                 |
| [Au <sub>2</sub> {(NH) <sub>2</sub> CH <sub>2</sub> } <sub>2</sub> ] (9)                 | 169.0        | –1.88                 |
| [Au <sub>2</sub> {N(NH)CH <sub>2</sub> } <sub>2</sub> ] (10)                             | 165.3        | 5.78                  |
| [Au <sub>2</sub> (N <sub>2</sub> CH) <sub>2</sub> ] (11)                                 | 170.1        | 11.12                 |
| [Au <sub>2</sub> {NH(CH) <sub>2</sub> } <sub>2</sub> ] (12)                              | 177.0        | –1.69                 |
| [Au <sub>2</sub> {NH(CH) <sub>2</sub> } <sub>2</sub> ] (13)                              | 170.7        | 12.32                 |
| [Au <sub>2</sub> {S <sub>2</sub> CC(CN) <sub>2</sub> } <sub>2</sub> ] <sup>2–</sup> (14) | 175.9        | –1.97                 |
| [Au <sub>2</sub> {N <sub>2</sub> (CH) <sub>2</sub> } <sub>2</sub> ] (15)                 | 164.0        | –22.01                |
| [Au <sub>2</sub> {(NH) <sub>2</sub> (CH) <sub>2</sub> } <sub>2</sub> ] (16)              | 172.6        | 13.83                 |
| [Au <sub>2</sub> Cl <sub>2</sub> {N(NH)(CH) <sub>2</sub> } <sub>2</sub> ] (17)           | 174.4        | –0.44                 |
| [AuCl(C <sub>4</sub> Ph <sub>4</sub> )(phen)] (18)                                       | 81.1         | –3.33                 |

## Molecular orbitals

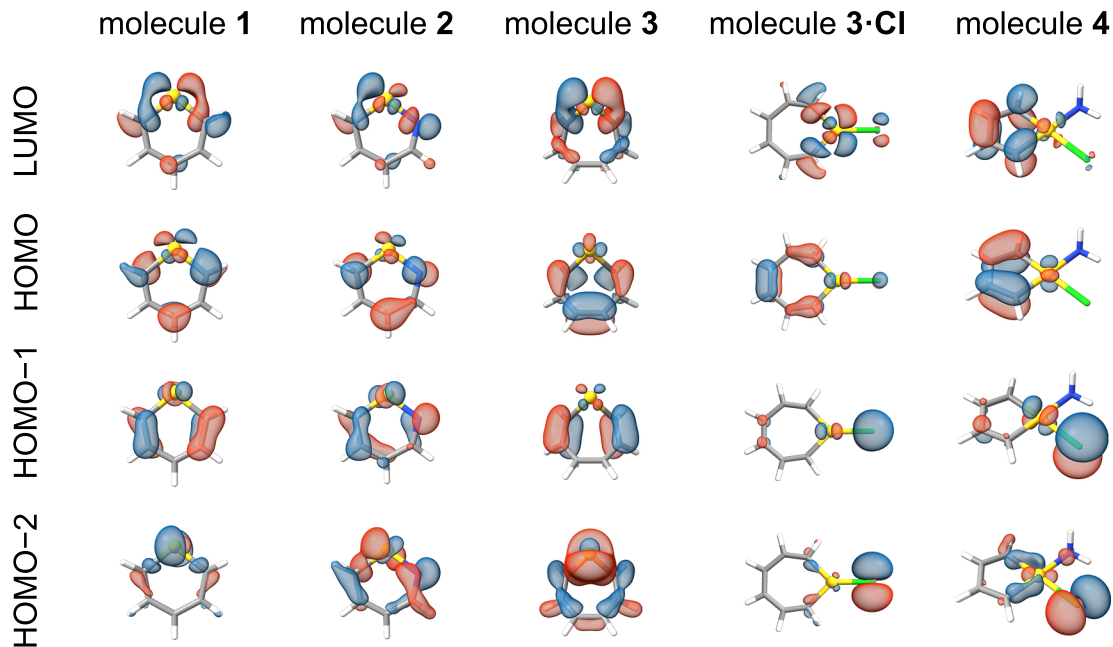

Fig. S1 Selected molecular orbitals of molecules 1-4. Color code: C, grey; H, white; Au, yellow; Cl, green; N, blue.

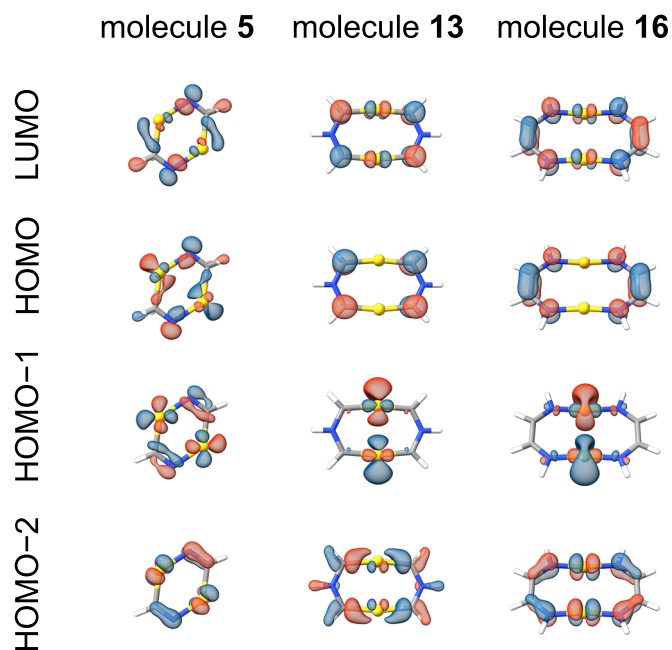

Fig. S2 Selected molecular orbitals of molecules 5, 13, and 16. Color code: C, grey; H, white; Au, yellow; N, blue.

## Cartesian coordinates

### [Au(C<sub>5</sub>H<sub>5</sub>)] (1, C<sub>2</sub>)

|    |            |            |            |
|----|------------|------------|------------|
| Au | -0.0001014 | 1.8572693  | -0.0007716 |
| C  | 1.2354779  | -0.6904050 | 0.1050386  |
| C  | 1.5026496  | 0.6544633  | 0.1958480  |
| C  | -1.5027887 | 0.6543031  | -0.1954919 |
| C  | -1.2354994 | -0.6905425 | -0.1050222 |
| C  | 0.0000300  | -1.3479206 | -0.0000949 |
| H  | 2.1264966  | -1.3197276 | 0.0792924  |
| H  | 2.4071462  | 1.0779947  | -0.2468744 |
| H  | -2.4070419 | 1.0779858  | 0.2475329  |
| H  | -2.1264604 | -1.3199478 | -0.0792533 |
| H  | 0.0000915  | -2.4311316 | -0.0002036 |

### [Au{C(CH<sub>2</sub>)CH<sub>2</sub>CHCHCH}] (1a, C<sub>1</sub>)

|    |            |            |            |
|----|------------|------------|------------|
| Au | -0.0645186 | 1.3992796  | -1.3470696 |
| C  | 1.3202580  | -0.8376768 | -0.3848650 |
| C  | 1.5276172  | 0.6678500  | -0.4430655 |
| C  | -1.5213658 | 0.6348541  | -0.4127580 |
| C  | -1.2072452 | -0.6724204 | 0.1114438  |
| C  | -0.0089907 | -1.3135678 | 0.1531598  |
| C  | 2.5599777  | 1.3438405  | 0.0610909  |
| H  | 1.4538721  | -1.2214062 | -1.4051524 |
| H  | -1.9762885 | 1.3022490  | 0.3308542  |
| H  | -2.0391296 | -1.1751404 | 0.6070324  |
| H  | 0.0123866  | -2.2894126 | 0.6281693  |
| H  | 3.3702012  | 0.8020770  | 0.5461243  |
| H  | 2.6334058  | 2.4216287  | 0.0093147  |
| H  | 2.1266819  | -1.2760703 | 0.2179724  |

### [Au{C(CH<sub>3</sub>)CHCHCHCH}] (1b, C<sub>1</sub>)

|    |            |           |            |
|----|------------|-----------|------------|
| Au | -0.0292876 | 1.8370158 | -0.0503912 |
|----|------------|-----------|------------|



|   |            |            |            |
|---|------------|------------|------------|
| C | 1.2203434  | -0.6770134 | 0.0672901  |
| C | 1.5101733  | 0.6626584  | 0.1218695  |
| C | -1.5370439 | 0.6402054  | -0.1881881 |
| C | -1.2574816 | -0.7048745 | -0.0946462 |
| C | -0.0152563 | -1.3459840 | -0.0114082 |
| C | 2.7757704  | 1.2738617  | -0.4193607 |
| H | 2.1096361  | -1.3101933 | 0.0642798  |
| H | -2.4174969 | 1.0641465  | 0.3007756  |
| H | -2.1423098 | -1.3416330 | -0.0467198 |
| H | -0.0028323 | -2.4287187 | 0.0157018  |
| H | 3.0517497  | 2.2083849  | 0.0692458  |
| H | 3.5792523  | 0.5547309  | -0.2263482 |
| H | 2.7440791  | 1.4327901  | -1.5020451 |

**[Au(NC<sub>4</sub>H<sub>4</sub>)] (2, C<sub>1</sub>)**

|    |            |            |            |
|----|------------|------------|------------|
| Au | 0.0411865  | 1.7669461  | -0.0989312 |
| N  | 1.5409905  | 0.6108481  | 0.2079510  |
| C  | 1.2392903  | -0.6560887 | 0.1516919  |
| C  | -1.5355906 | 0.6640695  | -0.1239063 |
| C  | -1.2541817 | -0.6846814 | -0.0896480 |
| C  | -0.0141078 | -1.3186098 | 0.0495395  |
| H  | 2.1242330  | -1.2957218 | 0.0639608  |
| H  | -2.4497302 | 1.0982898  | 0.2757801  |
| H  | -2.1223941 | -1.3425867 | -0.1551008 |
| H  | 0.0231579  | -2.3981187 | -0.0344627 |

**[Au{C(CH<sub>2</sub>)CH<sub>2</sub>CHCHN}] (2a, C<sub>1</sub>)**

|    |            |            |            |
|----|------------|------------|------------|
| Au | -0.0068279 | 1.3867605  | -1.3329175 |
| N  | -1.4251772 | 0.6095385  | -0.3793602 |
| C  | 1.3234367  | -0.8913875 | -0.4124888 |
| C  | 1.5382228  | 0.5871498  | -0.4254595 |
| C  | -1.1439727 | -0.6138044 | 0.1092349  |
| C  | 0.0271659  | -1.3155641 | 0.2229971  |
| C  | 2.5029031  | 1.3524834  | 0.0764963  |
| H  | 1.3946224  | -1.2415211 | -1.4553096 |
| H  | -2.0449853 | -1.0674198 | 0.5331778  |
| H  | -0.0092152 | -2.2929466 | 0.6845118  |
| H  | 3.3529188  | 0.8686654  | 0.5506006  |
| H  | 2.4865763  | 2.4326785  | 0.0367255  |
| H  | 2.1674828  | -1.3307973 | 0.1331888  |

**[Au{C(CH<sub>3</sub>)CHCHCHN}] (2b, C<sub>1</sub>)**

|    |            |            |            |
|----|------------|------------|------------|
| Au | -0.0822094 | 1.7426002  | 0.0681587  |
| N  | -1.5843932 | 0.5882154  | -0.2037751 |
| C  | 1.2302781  | -0.6698691 | 0.0626008  |
| C  | 1.5304559  | 0.6763748  | 0.0593857  |
| C  | -1.2709617 | -0.6790150 | -0.1467017 |
| C  | -0.0083818 | -1.3193434 | -0.0531130 |
| C  | 2.8090004  | 1.2813225  | -0.4392195 |
| H  | 2.0987813  | -1.3259921 | 0.1460805  |
| H  | -2.1490764 | -1.3264980 | -0.0510748 |
| H  | -0.0298652 | -2.3962079 | 0.0651776  |
| H  | 3.0746073  | 2.2078359  | 0.0667959  |
| H  | 3.6103567  | 0.5573833  | -0.2572499 |
| H  | 2.7782009  | 1.4644237  | -1.5177858 |

**[Au(C<sub>6</sub>H<sub>6</sub>)]<sup>+</sup> (3, C<sub>s</sub>)**

|    |            |            |            |
|----|------------|------------|------------|
| Au | 0.8068578  | 2.0331328  | 1.9379091  |
| C  | 0.1279888  | -0.5619408 | 0.0597389  |
| C  | 1.4850971  | -0.5618634 | 0.0593101  |
| C  | 2.3193226  | 0.6143349  | -0.0688189 |
| C  | -0.7063051 | 0.6142342  | -0.0684929 |
| C  | 2.1129371  | 1.8181139  | 0.4762236  |
| C  | -0.5000130 | 1.8179438  | 0.4767165  |
| H  | -0.3767348 | -1.5214473 | 0.0219350  |
| H  | 1.9899158  | -1.5213249 | 0.0213837  |
| H  | 3.2222408  | 0.5271485  | -0.6757146 |
| H  | -1.6093189 | 0.5268859  | -0.6752245 |
| H  | 2.6731631  | 2.7364240  | 0.3302923  |
| H  | -1.0601380 | 2.7363371  | 0.3309678  |

**[Au{C(CH<sub>2</sub>)CH<sub>2</sub>CHCHCHCH}]<sup>+</sup> (3a, C<sub>1</sub>)**

|    |            |            |            |
|----|------------|------------|------------|
| Au | 0.5594610  | 2.4873993  | 1.3330477  |
| C  | 0.2101298  | -0.5469910 | 0.2987221  |
| C  | 1.5392360  | -0.3699478 | 0.1791013  |
| C  | 2.1810960  | 0.8255682  | -0.4752008 |
| C  | -0.7854256 | 0.4233533  | -0.1321141 |
| C  | 2.2546392  | 2.0115717  | 0.4117996  |
| C  | -0.7681912 | 1.7395449  | 0.0887720  |
| C  | 3.2301217  | 2.8369544  | 0.7728300  |
| H  | -0.1619540 | -1.4911682 | 0.6831231  |
| H  | 2.1982909  | -1.1575381 | 0.5280225  |
| H  | 1.6297668  | 1.1036696  | -1.3806738 |
| H  | -1.6601999 | 0.0605262  | -0.6773431 |
| H  | -1.4246056 | 2.5167567  | -0.2930400 |
| H  | 3.2097809  | 0.5933874  | -0.7706135 |
| H  | 4.2349154  | 2.6201769  | 0.4110264  |
| H  | 3.1112499  | 3.7106778  | 1.4044807  |

**[Au{C(CH<sub>3</sub>)CHCHCHCHCH}]<sup>+</sup> (3b, C<sub>1</sub>)**

|    |            |            |            |
|----|------------|------------|------------|
| Au | 0.8006407  | 2.0043155  | 1.9132780  |
| C  | 0.1196058  | -0.5618548 | 0.0479187  |
| C  | 1.4744447  | -0.5344014 | 0.0490207  |
| C  | 2.3110017  | 0.6431587  | -0.0856460 |
| C  | -0.7405049 | 0.5986936  | -0.0662142 |
| C  | 2.1620391  | 1.8545656  | 0.4651973  |
| C  | -0.5596461 | 1.7927397  | 0.5044252  |
| C  | 2.9389327  | 3.1123474  | 0.2866914  |
| H  | -0.3664391 | -1.5312157 | 0.0188122  |
| H  | 1.9919249  | -1.4879346 | 0.0202311  |
| H  | 3.2010667  | 0.5403282  | -0.7103842 |
| H  | -1.6439457 | 0.5026427  | -0.6711532 |
| H  | -1.1412261 | 2.7023448  | 0.3917894  |
| H  | 3.4119359  | 3.4490706  | 1.2104255  |
| H  | 3.7250808  | 2.9082548  | -0.4469344 |
| H  | 2.3101838  | 3.9166181  | -0.0984507 |

**[AuCl(C<sub>6</sub>H<sub>6</sub>)] (3-Cl, C<sub>2v</sub>)**

|    |            |            |           |
|----|------------|------------|-----------|
| Au | -2.1789005 | -0.0024586 | 0.0000000 |
| Cl | -4.4533235 | 0.0102502  | 0.0000000 |
| C  | 1.6361342  | 0.6801353  | 0.0000000 |

|   |            |            |           |
|---|------------|------------|-----------|
| C | 1.6372373  | -0.6801399 | 0.0000000 |
| C | 0.5283420  | -1.5758749 | 0.0000000 |
| C | -0.8079606 | -1.3902396 | 0.0000000 |
| C | -0.8102811 | 1.3877101  | 0.0000000 |
| C | 0.5258146  | 1.5740870  | 0.0000000 |
| H | 2.6094311  | 1.1595364  | 0.0000000 |
| H | 2.6113794  | -1.1578497 | 0.0000000 |
| H | 0.7993256  | -2.6318482 | 0.0000000 |
| H | -1.4442405 | -2.2792426 | 0.0000000 |
| H | -1.4481031 | 2.2754137  | 0.0000000 |
| H | 0.7951451  | 2.6305208  | 0.0000000 |

**[AuCl(C<sub>4</sub>H<sub>4</sub>)(NH<sub>3</sub>)] (4, C<sub>1</sub>)**

|    |            |            |            |
|----|------------|------------|------------|
| Au | 0.7514889  | -0.1296517 | 0.0000000  |
| Cl | 2.8347516  | -1.1818154 | 0.0000000  |
| N  | 1.8575824  | 1.7268759  | 0.0000000  |
| C  | -0.3166223 | -1.8033443 | 0.0000000  |
| C  | -1.0864067 | 0.6611395  | 0.0000000  |
| C  | -1.6519007 | -1.6294849 | 0.0000000  |
| C  | -2.0885498 | -0.2416859 | 0.0000000  |
| H  | -2.3423574 | -2.4681449 | 0.0000000  |
| H  | -3.1366550 | 0.0447118  | 0.0000000  |
| H  | -1.2460666 | 1.7367147  | 0.0000000  |
| H  | 0.2148080  | -2.7480383 | 0.0000000  |
| H  | 1.6873619  | 2.2985660  | -0.8229709 |
| H  | 1.6873619  | 2.2985660  | 0.8229709  |
| H  | 2.8352038  | 1.4355914  | 0.0000000  |

**[AuCl{C(CH<sub>2</sub>)CH<sub>2</sub>CHCH}(NH<sub>3</sub>)] (4a, C<sub>1</sub>)**

|    |            |            |            |
|----|------------|------------|------------|
| Au | 0.1116933  | 0.2037598  | 0.0041018  |
| Cl | 2.0255484  | -1.1361524 | -0.2345721 |
| N  | 1.5394538  | 1.8342991  | 0.0554431  |
| C  | -1.2694523 | -1.2272584 | 0.0053414  |
| C  | -1.5148860 | 1.3292660  | 0.1606482  |
| C  | -2.6584196 | -0.7323058 | -0.3410720 |
| C  | -2.6933512 | 0.7262007  | -0.0469844 |
| C  | -0.9886522 | -2.4765098 | 0.3781108  |
| H  | -3.4141145 | -1.2952065 | 0.2189549  |
| H  | -3.6334032 | 1.2729319  | -0.0195626 |
| H  | -1.4279636 | 2.3922116  | 0.3776566  |
| H  | 1.4935570  | 2.4189373  | -0.7746508 |
| H  | 1.4663254  | 2.4343503  | 0.8721546  |
| H  | 2.4431883  | 1.3608381  | 0.0673448  |
| H  | 0.0142560  | -2.7993145 | 0.6201261  |
| H  | -1.7924466 | -3.2079427 | 0.4275173  |
| H  | -2.8608337 | -0.9042482 | -1.4062803 |

**[AuCl{C(CH<sub>3</sub>)CHCHCH}(NH<sub>3</sub>)] (4b, C<sub>1</sub>)**

|    |            |            |            |
|----|------------|------------|------------|
| Au | 0.0884225  | 0.1238193  | 0.0000057  |
| Cl | 2.2378612  | -0.8191499 | 0.0004489  |
| N  | 1.1497375  | 2.0166599  | 0.0000085  |
| C  | -0.9850462 | -1.5730457 | -0.0000898 |
| C  | -1.7431537 | 0.9201933  | 0.0000243  |
| C  | -2.3189591 | -1.3632656 | -0.0001059 |
| C  | -2.7473763 | 0.0224236  | 0.0000026  |

|   |            |            |            |
|---|------------|------------|------------|
| C | -0.3010849 | -2.8930727 | -0.0000940 |
| H | -3.0151501 | -2.1987693 | -0.0003198 |
| H | -3.7949024 | 0.3116905  | 0.0003636  |
| H | -1.8882159 | 1.9976362  | 0.0000263  |
| H | 0.9637828  | 2.5829249  | -0.8232921 |
| H | 0.9637630  | 2.5829450  | 0.8232904  |
| H | 2.1335712  | 1.7467385  | 0.0000206  |
| H | -1.0524659 | -3.6886802 | -0.0001435 |
| H | 0.3420487  | -3.0084217 | -0.8746326 |
| H | 0.3419862  | -3.0084686 | 0.8744868  |

**[Au<sub>2</sub>(NCH)<sub>2</sub>] (5, C<sub>2h</sub>)**

|    |            |            |           |
|----|------------|------------|-----------|
| Au | 1.2227506  | -0.8095578 | 0.0000000 |
| Au | -1.2227506 | 0.8095578  | 0.0000000 |
| N  | -0.4749027 | -1.9292450 | 0.0000000 |
| N  | 0.4749027  | 1.9292450  | 0.0000000 |
| C  | 1.4872849  | 1.1929810  | 0.0000000 |
| C  | -1.4872849 | -1.1929810 | 0.0000000 |
| H  | 2.5010730  | 1.5982531  | 0.0000000 |
| H  | -2.5010730 | -1.5982531 | 0.0000000 |

**[Au<sub>2</sub>(NHCH)<sub>2</sub>] (6, C<sub>2h</sub>)**

|    |            |            |           |
|----|------------|------------|-----------|
| Au | 1.3191879  | -0.0414348 | 0.0000000 |
| Au | -1.3191879 | 0.0414348  | 0.0000000 |
| N  | 0.5045285  | -2.0016669 | 0.0000000 |
| N  | -0.5045285 | 2.0016669  | 0.0000000 |
| C  | 0.7983281  | 1.8615270  | 0.0000000 |
| C  | -0.7983281 | -1.8615270 | 0.0000000 |
| H  | 0.8436025  | -2.9654145 | 0.0000000 |
| H  | -0.8436025 | 2.9654145  | 0.0000000 |
| H  | 1.3897740  | 2.7818285  | 0.0000000 |
| H  | -1.3897740 | -2.7818285 | 0.0000000 |

**[Au<sub>2</sub>Cl<sub>2</sub>(NHCH)<sub>2</sub>] (7, C<sub>2h</sub>)**

|    |            |            |           |
|----|------------|------------|-----------|
| Cl | 3.5332908  | -0.0813945 | 0.0000000 |
| Cl | -3.5332908 | 0.0813945  | 0.0000000 |
| Au | 1.2236795  | -0.0332743 | 0.0000000 |
| C  | 0.7150121  | 1.8860448  | 0.0000000 |
| N  | 0.5560745  | -2.0665738 | 0.0000000 |
| H  | 0.9364989  | -3.0157638 | 0.0000000 |
| C  | -0.7150121 | -1.8860448 | 0.0000000 |
| Au | -1.2236795 | 0.0332743  | 0.0000000 |
| N  | -0.5560745 | 2.0665738  | 0.0000000 |
| H  | -0.9364989 | 3.0157638  | 0.0000000 |
| H  | 1.4307143  | 2.7115742  | 0.0000000 |
| H  | -1.4307143 | -2.7115742 | 0.0000000 |

**[Au<sub>2</sub>Cl<sub>2</sub>{(NH)<sub>2</sub>CH<sub>2</sub>}] (8, D<sub>2h</sub>)**

|    |            |            |           |
|----|------------|------------|-----------|
| Au | 0.0000000  | 1.2511642  | 0.0000000 |
| Au | 0.0000000  | -1.2511642 | 0.0000000 |
| N  | 1.9726546  | 1.1494745  | 0.0000000 |
| N  | 1.9726546  | -1.1494745 | 0.0000000 |
| N  | -1.9726546 | -1.1494745 | 0.0000000 |
| N  | -1.9726546 | 1.1494745  | 0.0000000 |

|    |            |            |           |
|----|------------|------------|-----------|
| C  | 2.6091858  | 0.0000000  | 0.0000000 |
| C  | -2.6091858 | 0.0000000  | 0.0000000 |
| H  | 2.5265043  | 1.9964463  | 0.0000000 |
| H  | -2.5265043 | -1.9964463 | 0.0000000 |
| H  | 3.6993122  | 0.0000000  | 0.0000000 |
| H  | 2.5265043  | -1.9964463 | 0.0000000 |
| H  | -3.6993122 | 0.0000000  | 0.0000000 |
| H  | -2.5265043 | 1.9964463  | 0.0000000 |
| Cl | 0.0000000  | 3.5786994  | 0.0000000 |
| Cl | 0.0000000  | -3.5786994 | 0.0000000 |

**[Au<sub>2</sub>{(NH)<sub>2</sub>CH<sub>2</sub>}]<sub>2</sub> (9, D<sub>2h</sub>)**

|    |            |            |           |
|----|------------|------------|-----------|
| Au | 0.0000000  | 1.3682168  | 0.0000000 |
| Au | 0.0000000  | -1.3682168 | 0.0000000 |
| N  | 1.9778999  | 1.1769801  | 0.0000000 |
| N  | 1.9778999  | -1.1769801 | 0.0000000 |
| N  | -1.9778999 | -1.1769801 | 0.0000000 |
| N  | -1.9778999 | 1.1769801  | 0.0000000 |
| C  | 2.5779802  | 0.0000000  | 0.0000000 |
| C  | -2.5779802 | 0.0000000  | 0.0000000 |
| H  | 2.6307934  | 1.9484291  | 0.0000000 |
| H  | -2.6307934 | -1.9484291 | 0.0000000 |
| H  | 3.6691110  | 0.0000000  | 0.0000000 |
| H  | 2.6307934  | -1.9484291 | 0.0000000 |
| H  | -3.6691110 | 0.0000000  | 0.0000000 |
| H  | -2.6307934 | 1.9484291  | 0.0000000 |

**Au<sub>2</sub>{N(NH)CH<sub>2</sub>}]<sub>2</sub> (10, C<sub>i</sub>)**

|    |            |            |            |
|----|------------|------------|------------|
| Au | -0.1616504 | 1.3863730  | -0.0690891 |
| Au | 0.1616504  | -1.3863730 | 0.0690891  |
| N  | 2.0411209  | -1.0984410 | -0.2259407 |
| N  | -1.7852903 | -1.2911037 | 0.0546014  |
| N  | 1.7852903  | 1.2911037  | -0.0546014 |
| N  | -2.0411209 | 1.0984410  | 0.2259407  |
| C  | 2.4795453  | 0.1277010  | -0.0395884 |
| C  | -2.4795453 | -0.1277010 | 0.0395884  |
| H  | 2.3971626  | 2.0976182  | 0.0826760  |
| H  | -2.3971626 | -2.0976182 | -0.0826760 |
| H  | 3.5580808  | 0.2443859  | 0.1176886  |
| H  | -3.5580808 | -0.2443859 | -0.1176886 |

**[Au<sub>2</sub>(N<sub>2</sub>CH)<sub>2</sub>] (11, D<sub>2h</sub>)**

Triplet state optimized at the DFT/ $\omega$ B97X-D/def2-TZVP level of theory.

MP2 calculation is not possible because the HF SCF calculation does not converge.

|    |            |            |            |
|----|------------|------------|------------|
| Au | 0.0000000  | -0.0000000 | 1.3164918  |
| Au | 0.0000000  | -0.0000000 | -1.3164918 |
| N  | 1.9216174  | 0.0765404  | 1.1501187  |
| N  | 1.9216174  | 0.0765404  | -1.1501187 |
| N  | -1.9216174 | -0.0765404 | -1.1501187 |
| N  | -1.9216174 | -0.0765404 | 1.1501187  |
| C  | 2.5717588  | 0.1024889  | 0.0000000  |
| C  | -2.5717588 | -0.1024889 | 0.0000000  |
| H  | 3.6627176  | 0.1462106  | 0.0000000  |
| H  | -3.6627176 | -0.1462106 | 0.0000000  |

**[Au<sub>2</sub>{NH(CH)<sub>2</sub>}]<sub>2</sub> (12, C<sub>2h</sub>)**

|    |            |            |           |
|----|------------|------------|-----------|
| Au | -1.1984824 | -0.3554047 | 0.0000000 |
| Au | 1.1984824  | 0.3554047  | 0.0000000 |
| N  | -2.0047820 | 1.5284697  | 0.0000000 |
| N  | 2.0047820  | -1.5284697 | 0.0000000 |
| C  | -0.9992464 | 2.4320909  | 0.0000000 |
| C  | 0.3236234  | 2.1356759  | 0.0000000 |
| C  | 0.9992464  | -2.4320909 | 0.0000000 |
| C  | -0.3236234 | -2.1356759 | 0.0000000 |
| H  | -2.9393033 | 1.9055472  | 0.0000000 |
| H  | 2.9393033  | -1.9055472 | 0.0000000 |
| H  | -1.2615234 | 3.4939029  | 0.0000000 |
| H  | 1.1399188  | 2.8611103  | 0.0000000 |
| H  | 1.2615234  | -3.4939029 | 0.0000000 |
| H  | -1.1399188 | -2.8611103 | 0.0000000 |

**[Au<sub>2</sub>{NH(CH)<sub>2</sub>}]<sub>2</sub> (13, D<sub>2h</sub>)**

|    |            |            |           |
|----|------------|------------|-----------|
| Au | 0.0000000  | 1.3826533  | 0.0000000 |
| Au | 0.0000000  | -1.3826533 | 0.0000000 |
| N  | 2.5380601  | 0.0000000  | 0.0000000 |
| N  | -2.5380601 | 0.0000000  | 0.0000000 |
| C  | 1.9448275  | 1.2248770  | 0.0000000 |
| C  | 1.9448275  | -1.2248770 | 0.0000000 |
| C  | -1.9448275 | -1.2248770 | 0.0000000 |
| C  | -1.9448275 | 1.2248770  | 0.0000000 |
| H  | 2.7049637  | 2.0092267  | 0.0000000 |
| H  | -2.7049637 | -2.0092267 | 0.0000000 |
| H  | 3.5586533  | 0.0000000  | 0.0000000 |
| H  | 2.7049637  | -2.0092267 | 0.0000000 |
| H  | -3.5586533 | 0.0000000  | 0.0000000 |
| H  | -2.7049637 | 2.0092267  | 0.0000000 |

**[Au<sub>2</sub>{S<sub>2</sub>CC(CN)<sub>2</sub>}]<sub>2</sub><sup>2-</sup> (14, D<sub>2</sub>)**

|    |            |            |            |
|----|------------|------------|------------|
| Au | 0.0000000  | -1.3792085 | 0.0000000  |
| Au | 0.0000000  | 1.3792085  | 0.0000000  |
| N  | 0.5842055  | 2.0721886  | -5.8038917 |
| N  | 0.5842055  | -2.0721886 | 5.8038917  |
| N  | -0.5842055 | 2.0721886  | 5.8038917  |
| N  | -0.5842055 | -2.0721886 | -5.8038917 |
| C  | 0.0000000  | 0.0000000  | 2.9531095  |
| C  | 0.0000000  | 0.0000000  | -2.9531095 |
| C  | 0.0000000  | 0.0000000  | 4.3561182  |
| C  | 0.0000000  | 0.0000000  | -4.3561182 |
| C  | 0.3240825  | 1.1524293  | -5.1153733 |
| C  | 0.3240825  | -1.1524293 | 5.1153733  |
| C  | -0.3240825 | 1.1524293  | 5.1153733  |
| C  | -0.3240825 | -1.1524293 | -5.1153733 |
| S  | 0.5304743  | -1.4605275 | 2.1985358  |
| S  | -0.5304743 | 1.4605275  | 2.1985358  |
| S  | 0.5304743  | 1.4605275  | -2.1985358 |
| S  | -0.5304743 | -1.4605275 | -2.1985358 |

**[Au<sub>2</sub>{N<sub>2</sub>(CH)<sub>2</sub>}]<sub>2</sub> (15, D<sub>2</sub>)**

|    |           |            |           |
|----|-----------|------------|-----------|
| Au | 0.0000000 | 1.2270582  | 0.0000000 |
| Au | 0.0000000 | -1.2270582 | 0.0000000 |

|   |            |            |            |
|---|------------|------------|------------|
| N | -0.3574908 | 1.4989398  | 1.8993482  |
| N | 0.3574908  | -1.4989398 | 1.8993482  |
| N | -0.3574908 | -1.4989398 | -1.8993482 |
| N | 0.3574908  | 1.4989398  | -1.8993482 |
| C | -0.2058925 | 0.7099454  | 2.8982111  |
| C | 0.2058925  | -0.7099454 | 2.8982111  |
| C | -0.2058925 | -0.7099454 | -2.8982111 |
| C | 0.2058925  | 0.7099454  | -2.8982111 |
| H | -0.3963290 | 1.1346388  | 3.8955095  |
| H | 0.3963290  | -1.1346388 | 3.8955095  |
| H | -0.3963290 | -1.1346388 | -3.8955095 |
| H | 0.3963290  | 1.1346388  | -3.8955095 |

**[Au<sub>2</sub>{(NH)<sub>2</sub>(CH)<sub>2</sub>}]<sub>2</sub> (16, D<sub>2h</sub>)**

|    |           |            |            |
|----|-----------|------------|------------|
| Au | 0.0000000 | 1.4238396  | 0.0000000  |
| Au | 0.0000000 | -1.4238396 | 0.0000000  |
| N  | 0.0000000 | 1.5489889  | 1.9267781  |
| N  | 0.0000000 | -1.5489889 | 1.9267781  |
| N  | 0.0000000 | -1.5489889 | -1.9267781 |
| N  | 0.0000000 | 1.5489889  | -1.9267781 |
| C  | 0.0000000 | 0.6926740  | 2.9655493  |
| C  | 0.0000000 | -0.6926740 | 2.9655493  |
| C  | 0.0000000 | -0.6926740 | -2.9655493 |
| C  | 0.0000000 | 0.6926740  | -2.9655493 |
| H  | 0.0000000 | 1.1491246  | 3.9532168  |
| H  | 0.0000000 | -1.1491246 | 3.9532168  |
| H  | 0.0000000 | -1.1491246 | -3.9532168 |
| H  | 0.0000000 | 1.1491246  | -3.9532168 |
| H  | 0.0000000 | 2.5090655  | 2.2622705  |
| H  | 0.0000000 | -2.5090655 | 2.2622705  |
| H  | 0.0000000 | -2.5090655 | -2.2622705 |
| H  | 0.0000000 | 2.5090655  | -2.2622705 |

**[Au<sub>2</sub>Cl<sub>2</sub>{NH(CH)<sub>2</sub>N}]<sub>2</sub> (17, C<sub>2</sub>)**

|    |            |            |            |
|----|------------|------------|------------|
| Au | -1.1911662 | 0.3807502  | 0.1836974  |
| Au | 1.1911662  | -0.3807502 | 0.1836974  |
| N  | -1.7315717 | -1.4325545 | -0.5546320 |
| N  | 1.7315717  | 1.4325545  | -0.5546320 |
| N  | 0.7681201  | -2.0702191 | 1.0496890  |
| N  | -0.7681201 | 2.0702191  | 1.0496890  |
| C  | -1.2761425 | -2.6012704 | -0.2873178 |
| C  | -0.1909459 | -2.8319938 | 0.6856968  |
| C  | 1.2761425  | 2.6012704  | -0.2873178 |
| C  | 0.1909459  | 2.8319938  | 0.6856968  |
| H  | -1.7617467 | -3.4735673 | -0.7267246 |
| H  | -0.2530367 | -3.8090594 | 1.1805729  |
| H  | 1.7617467  | 3.4735673  | -0.7267246 |
| H  | 0.2530367  | 3.8090594  | 1.1805729  |
| H  | -2.5392127 | -1.3988647 | -1.1809345 |
| H  | 2.5392127  | 1.3988647  | -1.1809345 |
| Cl | -3.3753166 | 1.0646821  | -0.3543787 |
| Cl | 3.3753166  | -1.0646821 | -0.3543787 |

**[AuCl(C<sub>4</sub>Ph<sub>4</sub>)(py)] (18, C<sub>1</sub>)**

|    |            |           |           |
|----|------------|-----------|-----------|
| Au | -0.9680932 | 1.6185802 | 0.7245894 |
|----|------------|-----------|-----------|

|   |            |            |            |
|---|------------|------------|------------|
| N | -2.1503140 | 1.4950931  | 2.4894787  |
| C | -0.3838922 | -0.3073541 | 0.8110477  |
| C | 0.3516216  | -0.7239971 | -0.2571971 |
| C | 0.6364135  | 0.3165952  | -1.2427729 |
| C | 0.1289379  | 1.5522239  | -0.9570363 |
| C | -0.8144538 | -1.1380598 | 1.9304604  |
| C | -0.4389530 | -0.8187328 | 3.2449044  |
| C | -0.9022233 | -1.5711318 | 4.3192944  |
| C | -1.7519600 | -2.6570009 | 4.0986225  |
| C | -2.1189104 | -2.9946579 | 2.7955715  |
| C | -1.6542645 | -2.2424221 | 1.7195448  |
| C | 0.8067605  | -2.1141545 | -0.4146501 |
| C | 0.5590519  | -2.8042273 | -1.6096894 |
| C | 0.9629412  | -4.1281890 | -1.7559730 |
| C | 1.6311575  | -4.7771309 | -0.7178506 |
| C | 1.8911725  | -4.0944063 | 0.4701326  |
| C | 1.4819361  | -2.7724644 | 0.6213674  |
| C | 1.4686503  | 0.0631494  | -2.4309036 |
| C | 1.0288483  | 0.4395677  | -3.7063235 |
| C | 1.8241367  | 0.2068888  | -4.8244535 |
| C | 3.0699785  | -0.4043479 | -4.6841532 |
| C | 3.5148020  | -0.7842701 | -3.4182779 |
| C | 2.7180080  | -0.5583699 | -2.2993301 |
| C | 0.4087549  | 2.7534923  | -1.7360258 |
| C | 1.7393669  | 3.1646687  | -1.9034120 |
| C | 2.0444968  | 4.2558145  | -2.7105438 |
| C | 1.0247111  | 4.9495109  | -3.3610372 |
| C | -0.3019819 | 4.5523021  | -3.1915539 |
| C | -0.6112865 | 3.4697293  | -2.3755456 |
| C | -1.8490200 | 2.2416982  | 3.5623303  |
| C | -2.5074583 | 2.0692637  | 4.7729160  |
| C | -3.5169229 | 1.1177752  | 4.8693437  |
| C | -3.8450960 | 0.3752520  | 3.7394319  |
| C | -3.1370406 | 0.5875843  | 2.5656419  |
| H | 0.2227180  | 0.0266470  | 3.4114707  |
| H | -0.5983064 | -1.3146723 | 5.3287965  |
| H | -2.1153218 | -3.2425962 | 4.9358567  |
| H | -2.7674353 | -3.8459528 | 2.6177925  |
| H | -1.9385029 | -2.4979598 | 0.7028539  |
| H | 0.0444723  | -2.2979148 | -2.4203273 |
| H | 0.7601931  | -4.6527035 | -2.6833251 |
| H | 1.9512941  | -5.8062494 | -0.8358067 |
| H | 2.4184130  | -4.5905068 | 1.2777443  |
| H | 1.6900065  | -2.2358051 | 1.5415402  |
| H | 0.0599460  | 0.9171215  | -3.8110152 |
| H | 1.4712664  | 0.5026940  | -5.8063781 |
| H | 3.6896645  | -0.5840829 | -5.5554854 |
| H | 4.4832075  | -1.2586293 | -3.3020948 |
| H | 3.0661362  | -0.8544249 | -1.3147039 |
| H | 2.5275523  | 2.6118879  | -1.4018838 |
| H | 3.0769311  | 4.5645816  | -2.8328807 |
| H | 1.2612830  | 5.7987173  | -3.9923837 |
| H | -1.0982577 | 5.0950373  | -3.6889696 |
| H | -1.6416780 | 3.1633174  | -2.2363409 |
| H | -1.0746480 | 2.9858559  | 3.4213575  |
| H | -2.2288783 | 2.6818148  | 5.6213273  |



|    |            |            |           |
|----|------------|------------|-----------|
| H  | -4.0435267 | 0.9635674  | 5.8037868 |
| H  | -3.3415686 | 0.0226161  | 1.6646621 |
| H  | -4.6340926 | -0.3658997 | 3.7588087 |
| C1 | -1.5807429 | 3.8752666  | 0.6576498 |

## Magnetically induced current-density pathways

The MIC density strength is represented with a black ( $1 \cdot 10^{-6}$  nA T $^{-1}$ ) – red – orange – yellow – white ( $1 \cdot 10^{-1}$  nA T $^{-1}$ ) color scale.

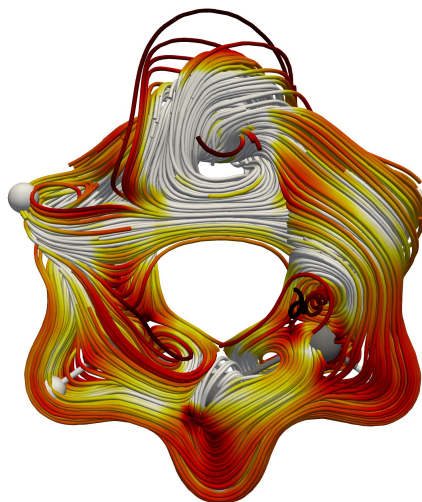

Fig. S3 The 3D streamline plot of the MIC density pathways of molecule  $[\text{Au}(\text{C}_5\text{H}_5)]$  (1). Color code: C, grey; H, white; Au, yellow.

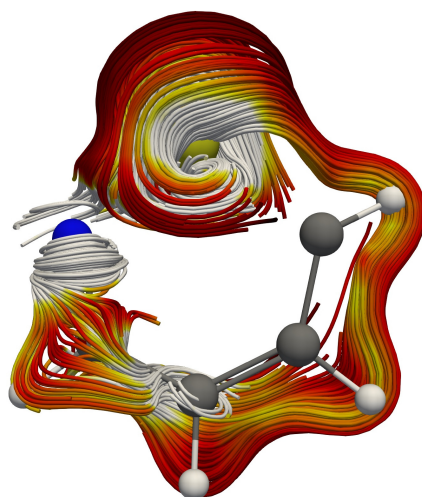

Fig. S4 The 3D streamline plot of the MIC density pathways of molecule  $[\text{Au}(\text{NC}_4\text{H}_4)]$  (2). Color code: C, grey; H, white; Au, yellow; N, blue.

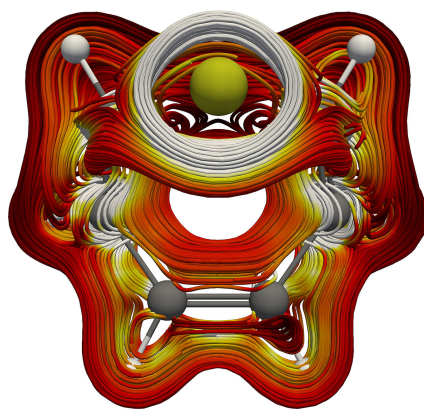

Fig. S5 The 3D streamline plot of the MIC density pathways of molecule  $[\text{Au}(\text{C}_6\text{H}_6)]^+$  (3). Color code: C, grey; H, white; Au, yellow.

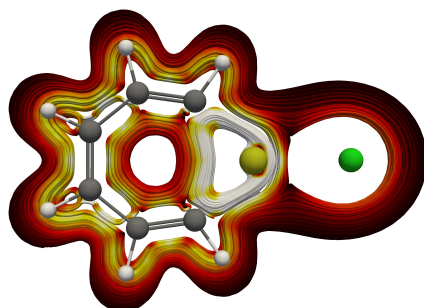

Fig. S6 The 3D streamline plot of the MIC density pathways of molecule  $[\text{AuCl}(\text{C}_6\text{H}_6)]$  (3-Cl). Color code: C, grey; H, white; Au, yellow; Cl, green.

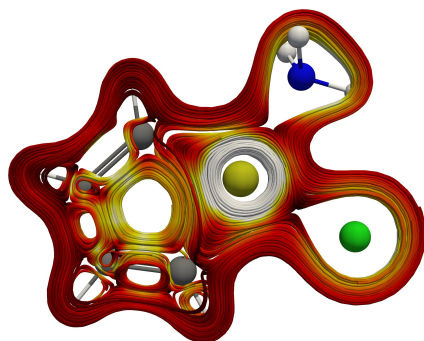

Fig. S7 The 3D streamline plot of the MIC density pathways of molecule  $[\text{AuCl}(\text{C}_4\text{H}_4)(\text{NH}_3)]$  (4). Color code: C, grey; H, white; Au, yellow; Cl, green; N, blue.

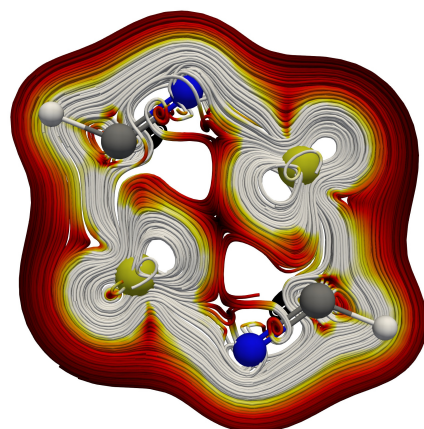

Fig. S8 The 3D streamline plot of the MIC density pathways of molecule  $[\text{Au}_2(\text{NCH})_2]$  (5). Color code: C, grey; H, white; Au, yellow; N, blue.

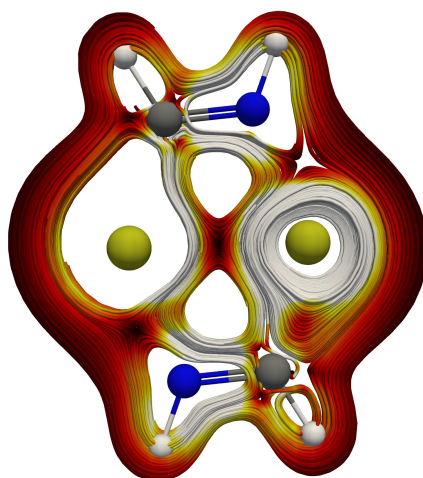

Fig. S9 The 3D streamline plot of the MIC density pathways of molecule  $[\text{Au}_2(\text{NHCH})_2]$  (6). Color code: C, grey; H, white; Au, yellow; N, blue.

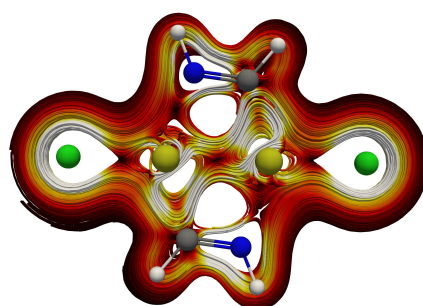

Fig. S10 The 3D streamline plot of the MIC density pathways of molecule  $[\text{Au}_2\text{Cl}_2(\text{NHCH})_2]$  (7). Color code: C, grey; H, white; Au, yellow; Cl, green; N, blue.

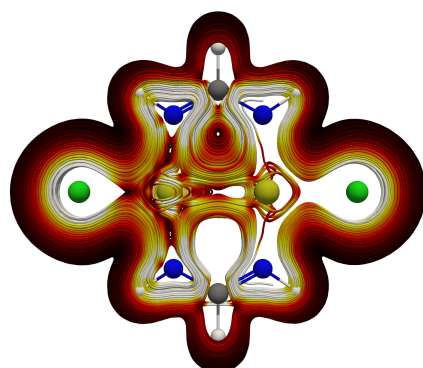

Fig. S11 The 3D streamline plot of the MIC density pathways of molecule  $[\text{Au}_2\text{Cl}_2\{(\text{NH})_2\text{CH}\}_2]$  (8). Color code: C, grey; H, white; Au, yellow; Cl, green; N, blue.

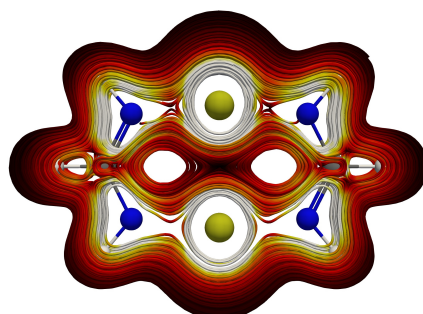

Fig. S12 The 3D streamline plot of the MIC density pathways of molecule  $[\text{Au}_2\{(\text{NH})_2\text{CH}\}_2]$  (9). Color code: C, grey; H, white; Au, yellow; N, blue.

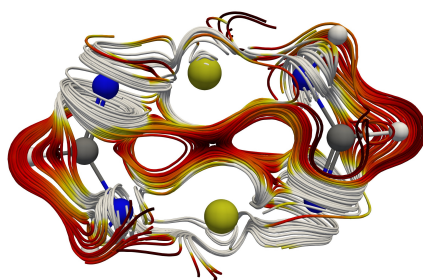

Fig. S13 The 3D streamline plot of the MIC density pathways of molecule  $[\text{Au}_2(\text{NHNCH})_2]$  (10). Color code: C, grey; H, white; Au, yellow; N, blue.

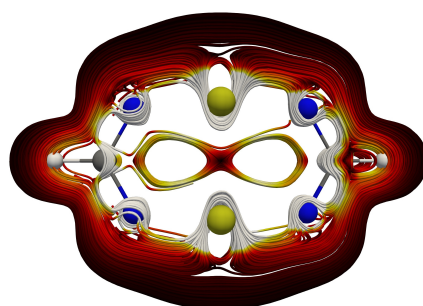

Fig. S14 The 3D streamline plot of the MIC density pathways of molecule  $[\text{Au}_2(\text{N}_2\text{CH})_2]$  (11). Color code: C, grey; H, white; Au, yellow; N, blue.

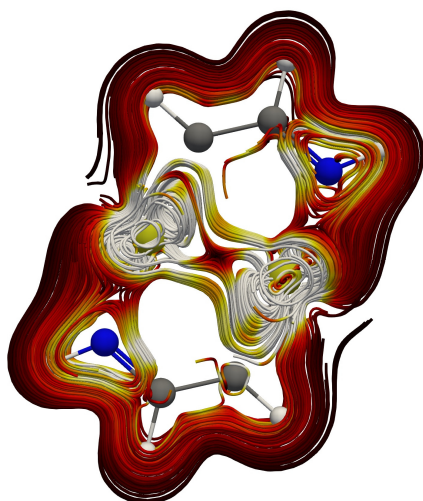

Fig. S15 The 3D streamline plot of the MIC density pathways of molecule  $[\text{Au}_2\{(\text{CH})_2\text{NH}\}_2]$  (12). Color code: C, grey; H, white; Au, yellow; N, blue.

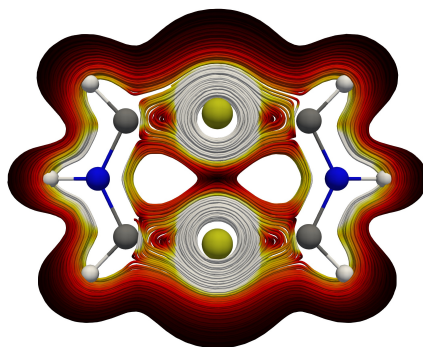

Fig. S16 The 3D streamline plot of the MIC density pathways of molecule  $[\text{Au}_2\{(\text{CH})_2\text{NH}\}_2]$  (13). Color code: C, grey; H, white; Au, yellow; N, blue.

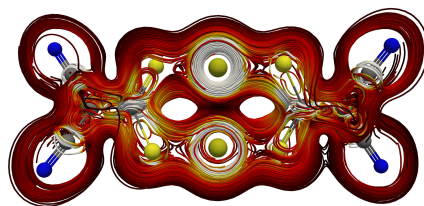

Fig. S17 The 3D streamline plot of the MIC density pathways of molecule  $[\text{Au}_2\{\text{S}_2\text{CC}(\text{CN})_2\}_2]^{2-}$  (14). Color code: C, grey; H, white; Au, dark yellow; N, blue; S, light yellow.

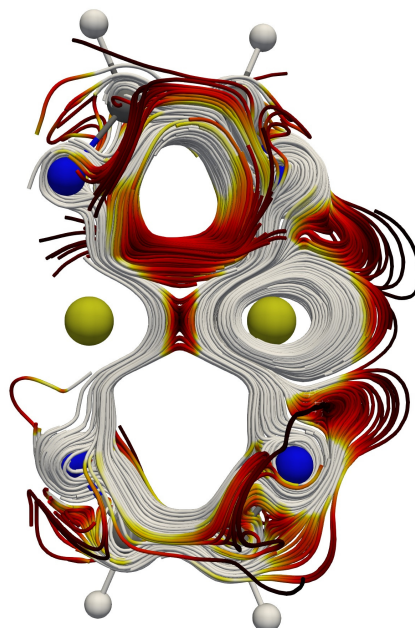

Fig. S18 The 3D streamline plot of the MIC density pathways of molecule  $[\text{Au}_2\{\text{N}_2(\text{CH})_2\}_2]$  (15). Color code: C, grey; H, white; Au, yellow; N, blue.

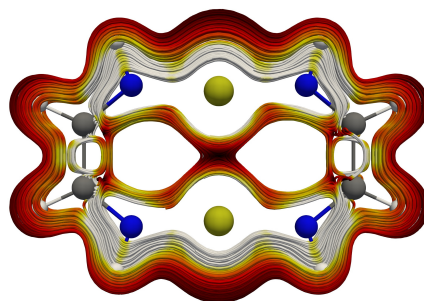

Fig. S19 The 3D streamline plot of the MIC density pathways of molecule  $[\text{Au}_2\{(\text{NH}_2)(\text{CH}_2)\}_2]$  (16). Color code: C, grey; H, white; Au, yellow; N, blue.



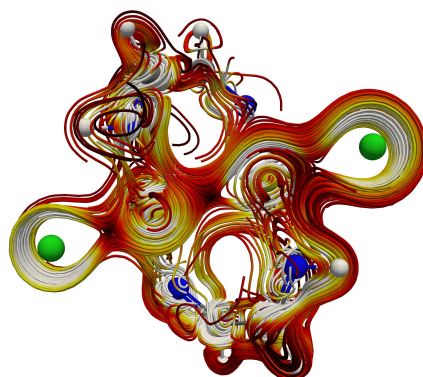

Fig. S20 The 3D streamline plot of the MIC density pathways of molecule  $[\text{Au}_2\text{Cl}_2\{(\text{NH}_2)(\text{CH}_2)\}_2]$  (17). Color code: C, grey; H, white; Au, yellow; Cl, green; N, blue.
